# Supplementary material for: DpaA Detaches Braun’s Lipoprotein from Peptidoglycan
Source: PubMed Central journal article supplement (PMC8263019; doi:10.1128/mbio.00836-21), 2021-05-04
Supplement: mbio.00836-21-st002.pdf [file mbio.00836-21-st002.pdf]

**Table S2.** MS analysis of collected muropeptide fractions (**Fig. 3**).

| <b>Muropeptide (reduced)</b> | <b>Retention time (min)</b> | <b>Measured mass (charge) (Da)</b> | <b>Measured neutral mass (Da)</b> | <b>Theoretical neutral mass (Da)</b> |
|------------------------------|-----------------------------|------------------------------------|-----------------------------------|--------------------------------------|
| <b>Tri</b>                   | 20.2                        | 870.8614 (+1)                      | 869.8536                          | 870.3706                             |
| <b>Tri-LysArg</b>            | 34.1                        | 578.1715 (+2)                      | 1154.3274                         | 1154.5667                            |
| <b>TetraTri</b>              | 42.4                        | 897.4247 (+2)                      | 1792.8338                         | 1793.7677                            |
| <b>TetraTri-LysArg</b>       | 51.2                        | 693.4853 (+3)                      | 2077.4325                         | 2077.9638                            |
