# Supplementary material for: DpaA Detaches Braun’s Lipoprotein from Peptidoglycan
Source: PubMed Central journal article supplement (PMC8263019; doi:10.1128/mbio.00836-21), 2021-05-04
Supplement: mbio.00836-21-st003.pdf [file mbio.00836-21-st003.pdf]

**Table S3.** Strains and plasmids used in this work.

| Strains / plasmids                | Relevant features                                                                                                                                                                                                                                   | Reference / source |
|-----------------------------------|-----------------------------------------------------------------------------------------------------------------------------------------------------------------------------------------------------------------------------------------------------|--------------------|
| Strains                           |                                                                                                                                                                                                                                                     |                    |
| BL21(DE3)                         | Overexpression strain F- <i>ompT</i> , <i>hsdSB</i> (rB-mB-) ( $p_{lacUV5}::T7gene1$ ), $\lambda$ (DE3)                                                                                                                                             | Novagen            |
| LOBSTR BL21(DE3)                  | F- <i>ompT</i> <i>hsdSB</i> (rB- mB-) <i>gal dcm</i> (DE3), carries genomically modified copies of <i>arnA</i> and <i>slyD</i>                                                                                                                      | Kerafast           |
| BW25113                           | <i>lacI<sup>q</sup></i> <i>rrnB</i> <sub>T14</sub> $\Delta lacZ$ <sub>WJ16</sub> <i>hsdR514</i> $\Delta araBAD$ <sub>AH33</sub> $\Delta rhaBAD$ <sub>LD78</sub>                                                                                     | (1)                |
| BW25113 $\Delta lpp$              | BW25113 $\Delta lpp::frrt$                                                                                                                                                                                                                          | This work          |
| (AMM14)                           | BW25113 $\Delta ldtA::frrt$ $\Delta ldtB::frrt$ $\Delta ldtC::frrt$                                                                                                                                                                                 | (2)                |
| BW25113 $\Delta ldtABC$           |                                                                                                                                                                                                                                                     |                    |
| (AMM28)                           | BW25113 $\Delta ldtD::frrt$ $\Delta ldtE::frrt$ $\Delta dpaA::frrt$                                                                                                                                                                                 | (2)                |
| BW25113 $\Delta ldtDE\Delta dpaA$ |                                                                                                                                                                                                                                                     |                    |
| BW25113 $\Delta 6LDT$             | <i>lacI<sup>q</sup></i> <i>rrnB</i> <sub>T14</sub> $\Delta lacZ$ <sub>WJ16</sub> <i>hsdR514</i> $\Delta araBAD$ <sub>AH33</sub> $\Delta rhaBAD$ <sub>LD78</sub> $\Delta ldtA$ $\Delta ldtB$ $\Delta ldtC$ $\Delta ldtD$ $\Delta ldtE$ $\Delta dpaA$ | (3)                |
| (AMM24)                           | BW25113 $\Delta dpaA::frrt$                                                                                                                                                                                                                         | (4)                |
| BW25113 $\Delta dpaA$             |                                                                                                                                                                                                                                                     |                    |
| BW25113 $\Delta dpaA\Delta lpp$   | BW25113 $\Delta dpaA::frrt$ $\Delta lpp::frrt$                                                                                                                                                                                                      | This work          |
| (AMM30)                           | BW25113 $\Phi(kan araC araBp ptC)1$ $\Delta dpaA::frrt$                                                                                                                                                                                             | (4)                |
| <i>araBp ptC</i> $\Delta dpaA$    |                                                                                                                                                                                                                                                     |                    |
| Plasmids                          |                                                                                                                                                                                                                                                     |                    |
| pETMM82                           | pETMM82 derivative; expresses LdtD with an N-terminal DsbC and a 6xHis tag                                                                                                                                                                          | (5)                |
| pET28a-LdtE-his                   | LdtE <sup>1-334</sup> -His <sub>6</sub> , native signal peptide, Kan <sup>R</sup>                                                                                                                                                                   | This work          |
| pET29b-DpaA-his                   | PeIBss- DpaA <sup>20-246</sup> -His <sub>6</sub> , Kan <sup>R</sup>                                                                                                                                                                                 | This work          |
| pET29b-DpaA(C143A)-his            | PeIBss- DpaA <sup>20-246</sup> -His <sub>6</sub> C143A, Kan <sup>R</sup>                                                                                                                                                                            | This work          |
| pGS100                            | pGZ119EH derivative, contains TIR sequence downstream of <i>ptac</i> , Cam <sup>R</sup>                                                                                                                                                             | (6)                |
| pGS124 (pDpaA)                    | pGZ119H derivative; expresses DpaA under the <i>tac</i> promoter; Cam <sup>R</sup>                                                                                                                                                                  | (4)                |
| pGS124-DpaA(C143A)                | pGZ119H derivative; expresses DpaA DpaA(C143A), <i>tac</i> promoter; Cam <sup>R</sup>                                                                                                                                                               | This work          |
| pDpaA(C143A)                      |                                                                                                                                                                                                                                                     |                    |
| pTB63                             | <i>tetA</i> PftsQAZ:: <i>ftsQAZ</i>                                                                                                                                                                                                                 | (7)                |
| pCP20                             | FLP expression, temperature sensitive replication; Cam <sup>R</sup> and Amp <sup>R</sup> .                                                                                                                                                          | (1)                |

## References:

1. Datsenko KA, Wanner BL. 2000. One-step inactivation of chromosomal genes in *Escherichia coli* K-12 using PCR products. *Proc Natl Acad Sci U S A* 97:6640-5.
2. Peters K, Pazos M, Edoo Z, Hugonnet JE, Martorana AM, Polissi A, VanNieuwenhze MS, Arthur M, Vollmer W. 2018. Copper inhibits peptidoglycan LD-transpeptidases suppressing beta-lactam resistance due to bypass of penicillin-binding proteins. *Proc Natl Acad Sci U S A* 115:10786-10791.
3. Kuru E, Lambert C, Rittichier J, Till R, Ducret A, Derouaux A, Gray J, Biboy J, Vollmer W, VanNieuwenhze M, Brun YV, Sockett RE. 2017. Fluorescent D-amino-acids reveal bi-cellular cell wall modifications important for *Bdellovibrio bacteriovorus* predation. *Nat Microbiol* 2:1648-1657.
4. Moré N, Martorana AM, Biboy J, Otten C, Winkle M, Serrano CKG, Monton Silva A, Atkinson L, Yau H, Breukink E, den Blaauwen T, Vollmer W, Polissi A. 2019. Peptidoglycan remodeling enables *Escherichia coli* to survive severe outer membrane assembly defect. *mBio* 10(1):e02729-18.
5. Hugonnet JE, Mengin-Lecreulx D, Monton A, den Blaauwen T, Carbonnelle E, Veckerle C, Brun YV, van Nieuwenhze M, Bouchier C, Tu K, Rice LB, Arthur M. 2016. Factors essential for L,D-transpeptidase-mediated peptidoglycan cross-linking and beta-lactam resistance in *Escherichia coli*. *Elife* 5:e19469.
6. Sperandio P, Pozzi C, Deho G, Polissi A. 2006. Non-essential KDO biosynthesis and new essential cell envelope biogenesis genes in the *Escherichia coli* *yrbG-yhbG* locus. *Res Microbiol* 157:547-58.
7. Bendezu FO, Hale CA, Bernhardt TG, de Boer PA. 2009. RodZ (YfgA) is required for proper assembly of the MreB actin cytoskeleton and cell shape in *E. coli*. *EMBO J* 28:193-204.
