# Supplementary material for: DpaA Detaches Braun’s Lipoprotein from Peptidoglycan
Source: PubMed Central journal article supplement (PMC8263019; doi:10.1128/mbio.00836-21), 2021-05-04
Supplement: mbio.00836-21-st004.pdf [file mbio.00836-21-st004.pdf]

**Table S4.** Oligonucleotides used in this study.

| <b>Primer</b>            | <b>Sequence 5'→3'</b>                                                                 | <b>Construct(s)</b>    |
|--------------------------|---------------------------------------------------------------------------------------|------------------------|
| DpaAGS_C143A_F           | TTC CAT CGG CGC CTA CGC AAT GAC                                                       | pGS124-DpaA(C143A)     |
| DpaAGS_C143A_R           | ACA CAA TCG CCG TGG ATC                                                               | pGS124-DpaA(C143A)     |
| DpaA_C143A_F             | TCATTGCGTAggcGCCGATGGAAAC                                                             | pET29b-DpaA(C143A)-his |
| DpaA_C143A_R             | CCAATCAGGGTATTGATG                                                                    | pET29b-DpaA(C143A)-his |
| LdtE_pET28a_F            | TTA GTT CCT CGT GGT TCT CTC GAG<br>CAC CAC CAC CAC                                    | pET28a-LdtE-his        |
| LdtE_pET28a_R            | CCA TGG TAT ATC TCC TTC TTA AAG<br>TTA AAC AAA ATT                                    | pET28a-LdtE-his        |
| LdtE_Insert_F            | GAA GAA GAT ATA CCA TGG ATG AAA<br>CGC GCG TCT TTG                                    | pET28a-LdtE-his        |
| LdtE_Insert_R            | AGA ACC ACG AGG AAC TAA CTG CGT<br>CAC GCG TAA CAT                                    | pET28a-LdtE-his        |
| PeIBss-<br>DpaA_pET29b_F | GCGCC CAG CCG GCG ATG GCc ggt ttg<br>ctg ggc agc ag                                   | pET29b-DpaA-his        |
| DpaA_pET29b_R            | GGA TCC GAT ATC GCC ATG GAA CCG<br>CGT GGC ACC AGg gta cct ttt gcc tcg ggg<br>agc gtg | pET29b-DpaA-his        |
| PeIBss_F                 | GGC CAT CGC CGG CTG GGC                                                               | pET29b-DpaA-his        |
| PeIBss_R                 | ACT ATA GGG GAA TTG TGA GCG G                                                         | pET29b-DpaA-his        |
